# Supplementary material for: Patients’ and healthcare providers’ perceptions of a mobile portal application for hospitalized patients
Source: Springer Nature journal article supplement (doi:10.1186/s12911-016-0363-7), 2016-09-21
Supplement: MOESM1 [file 12911_2016_363_MOESM1_ESM.pdf › 12911_2016_363_MOESM1_ESM.pdf]

Login With  
PatientConnect

Login or Sign Up With  
*MyChart*

Login With  
RelayHealth

Login With  
athenahealth

# Good Morning John Doe

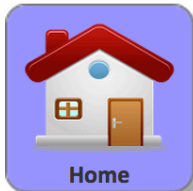

Home

Welcome to Northwestern Memorial Hospital.

## Today's Schedule

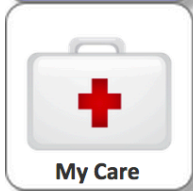

My Care

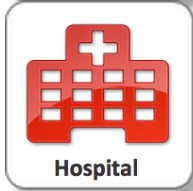

Hospital

|          |          |                                    |
|----------|----------|------------------------------------|
| 8:00 AM  | 9:30 AM  | Breakfast                          |
| 9:00 AM  | 11:30 AM | Physician Rounding                 |
| 11:30 AM | 1:00 PM  | Lunch                              |
| 5:00 PM  | 7:00 PM  | Dinner                             |
| Upcoming |          | Consistent Carbohydrate (ADA Diet) |

[iPad Instructions](#)

[Feedback](#)

Currently

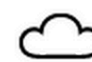

**61°F**  
Overcast

Tomorrow

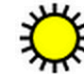

High **64°F**  
Low **54°F**

forecast provided by **wu** WEATHER UNDERGROUND

### Google News

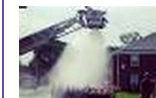

SO SAD: Fire Captain, Injured During Ice Bucket Challenge, Dead One Month ... - Global Grind  
Google - 10 hours ago

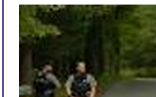

Police find weapon belonging to cop killing suspect - USA TODAY  
Google - 2 hours ago

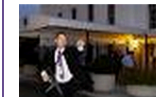

Secret Service reviews White House security after fence-jumper enters mansion - Washington Post  
Google - 2 hours ago

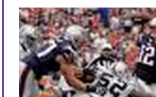

Purdy: Raiders are what we thought they were - San Jose Mercury News  
Google - 2 hours ago

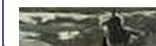

New Afghan president, but vote totals kept secret - Chron.com

powered by **FeedGrabbr**

[See More Events...](#)

Access to NMHC resources through this system is subject to the terms of the NORTHWESTERN MEMORIAL HEALTHCARE INFORMATION ACCESS AND CONFIDENTIALITY AGREEMENT. This system may be accessed and used by authorized personnel only. Authorized users may only perform authorized activities and may not exceed the limits of such authorization. Disclosure of information found in this system for any unauthorized use is strictly prohibited. All activities on this system are subject to monitoring.

# John Doe's Profile

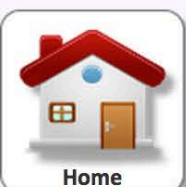

Home

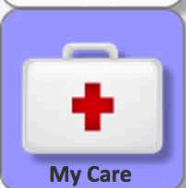

My Care

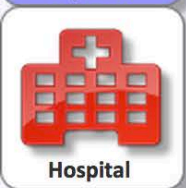

Hospital

## Allergies

Advil

Active

## Active Conditions

PYELONEPHRITIS, UNSPECIFIED

2014-09-20

HYPERTENSION

2014-09-20

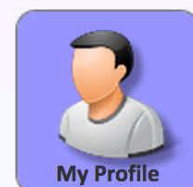

My Profile

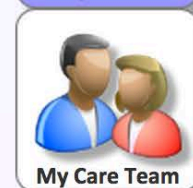

My Care Team

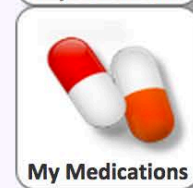

My Medications

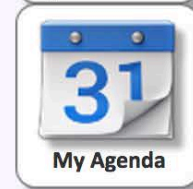

My Agenda

## Personal Information

**Primary Care Provider:** DAVID LIEBOVITZ

**Unit:** Feinberg 13 E, 1313

**Medical Service:** GENERAL MEDICINE

**Email:**

# John Doe's Care Team

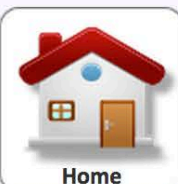

Home

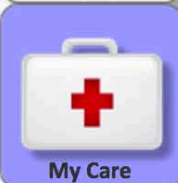

My Care

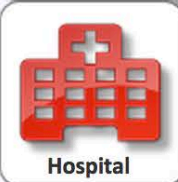

Hospital

## VERMYLEN, MD, JULIA L.

### Attending Doctor

The attending is the doctor in charge of all the care you receive; they will work with you and the rest of the healthcare team to identify the best treatment plans and goals.

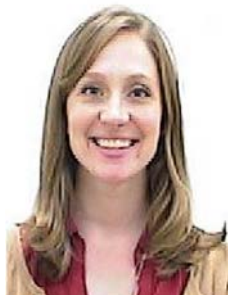

## Rogalla, Heidi

### Nurse

Nurses perform routine patient care activities and give updates to the healthcare team about how a patient is feeling. Let them know if you need anything.

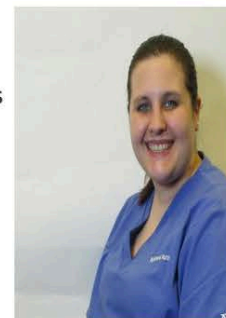

## KAMATH, SUNEEL

### Resident

Residents are doctors that are training to become attending physicians; they can do everything the attending can, but will talk to the attending before any changes in your care are made.

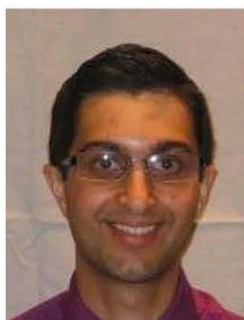

## WHITSETT, MAUREEN

### Intern

Interns are doctors in their first year out of medical school; they are training to become residents and perform many of the same duties.

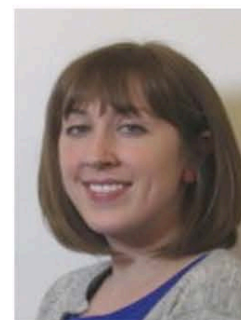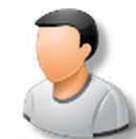

My Profile

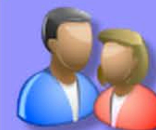

My Care Team

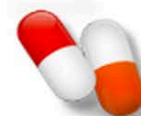

My Medications

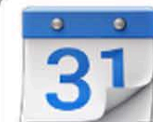

My Agenda

# John Doe's Medications

## Scheduled Medications

### Hydrochlorothiazide 25mg Tab

Route:Oral,Frequency:Daily  
Last Administered:09-21-2014 12:59

[Click for Info:](#)  
**UpToDate**

### Lansoprazole 30mg Cap DR

Route:Oral,Frequency:Daily (7 AM)  
Last Administered:09-21-2014 12:59

[Click for Info:](#)  
**UpToDate**

### Lisinopril 20mg Tab

Route:Oral,Frequency:Daily  
Last Administered:09-21-2014 09:50

[Click for Info:](#)  
**UpToDate**

### Nystatin 100,000unit/g Powder 15g

Route:Topical,Frequency:Twice per Day  
Last Administered:09-21-2014 09:50

[Click for Info:](#)  
**UpToDate**

### Piperacillin/Tazobactam + Sodium Chloride 0.9% 100 mL

Route:IVPB,Frequency:Every 12 Hours  
Last Administered:09-21-2014 16:59

[Click for Info:](#)  
**UpToDate**

## Take as Needed

### Fluticasone Propionate 0.05% Nasal Spray 16g

Route:Each Nostril

[Click for Info:](#)  
**UpToDate**

### Acetaminophen 325mg Tab

Route:Oral

[Click for Info:](#)  
**UpToDate**

### Insulin lispro (rDNA) (HumaLOG) 100unit/mL Inj MDVL 3mL

Route:Under the Skin

[Click for Info:](#)  
**UpToDate**

### Dextrose 50% Inj LIFESH 50mL

Route:IV Push

[Click for Info:](#)  
**UpToDate**

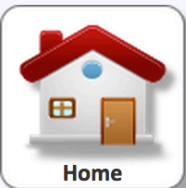

Home

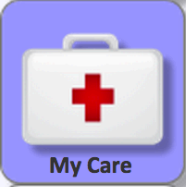

My Care

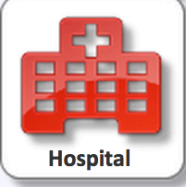

Hospital

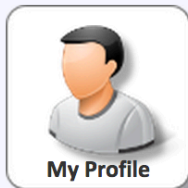

My Profile

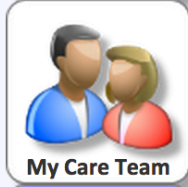

My Care Team

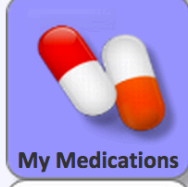

My Medications

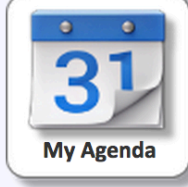

My Agenda
